# Supplementary material
Source: PubMed Central journal article supplement (PMC5899462)
Supplement: pnas.1720193115.sapp.pdf [file pnas.1720193115.sapp.pdf]

**Fig. S1.** Maximum likelihood tree topology of *Sp6-9* orthologs (lnL = -5444.20). Numbers adjacent to nodes represent bootstrap resampling frequencies. Numbers below nodes represent posterior probabilities from Bayesian inference searches. Terminals in boldface represent newly discovered new *Sp6-9* orthologs reported in this study. Left inset: Tree topology based on all *Sp* homologs, including *Krüppel-like factor* (KLF) outgroups (lnL = -6504.88). Scale bars: 0.5.

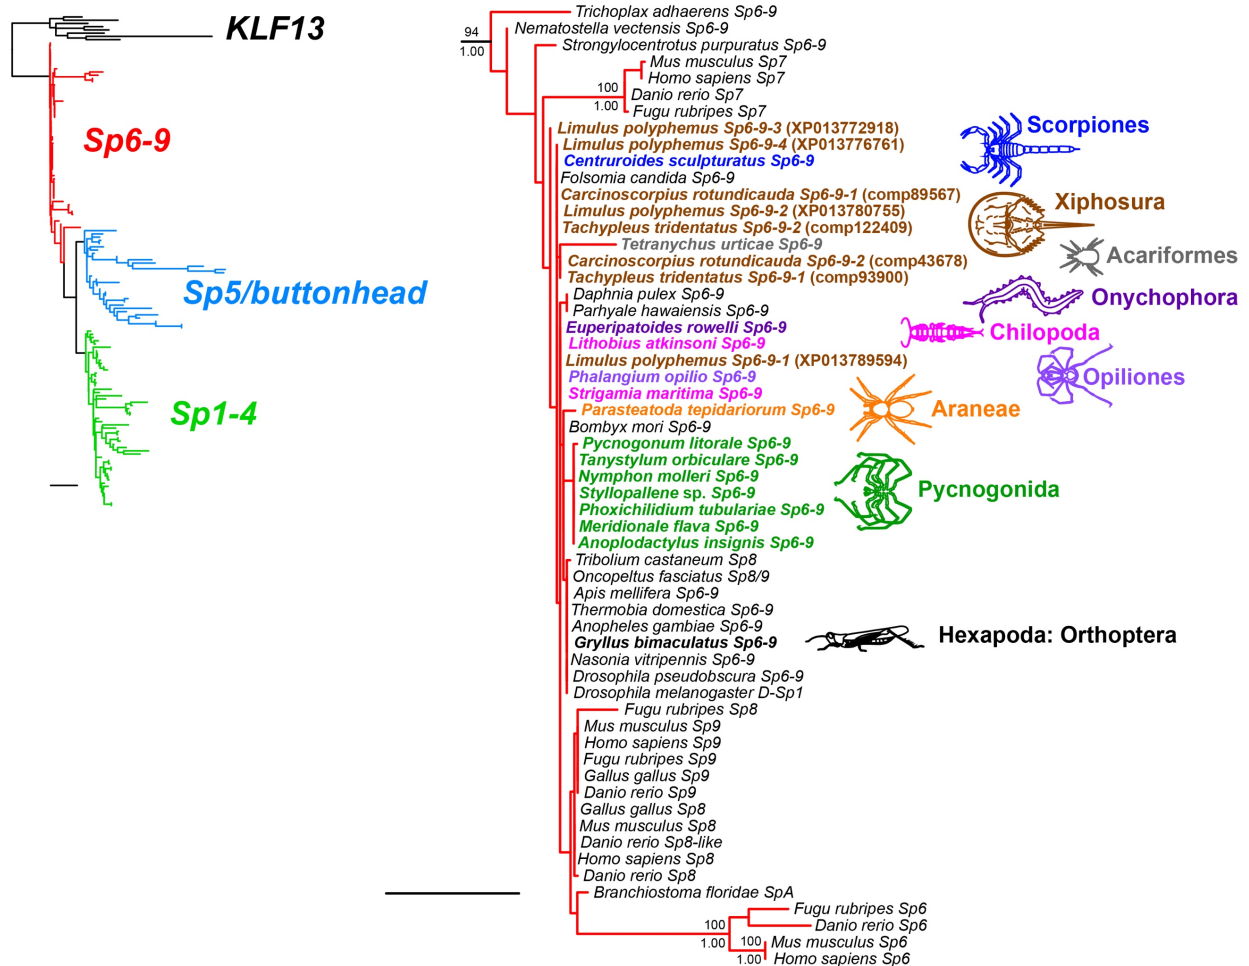

**Fig. S2.** Maximum likelihood tree topology of *arr*/*LRP* orthologs (lnL = -22191.04). Numbers adjacent to nodes represent bootstrap resampling frequencies.

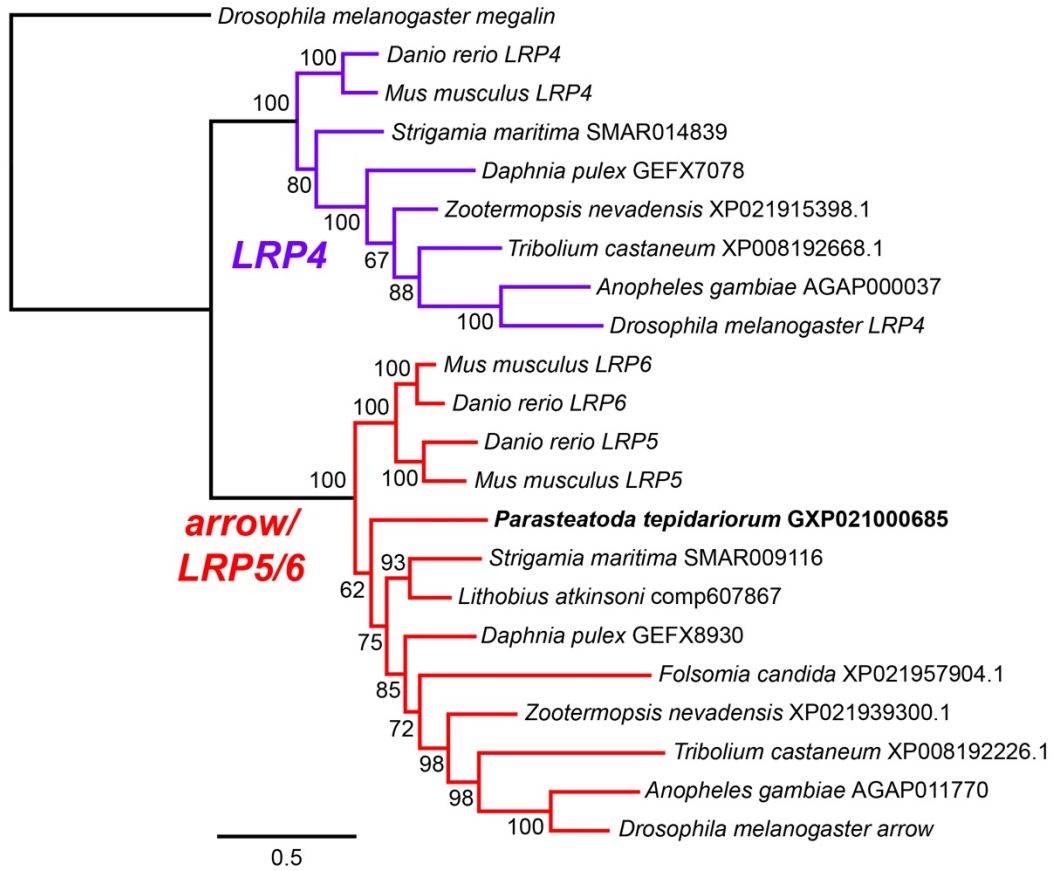

**Fig. S3.** Expression of *Ptep-Sp6-9* in the spider. (A) In early limb bud stages, *Ptep-Sp6-9* is expressed in all prosomal limb buds, the head lobe, and as faint stripes in the opisthosoma (arrowheads). (B) In later stages, *Ptep-Sp6-9* expression in the head lobe becomes more prominent (arrowhead). In all but the cheliceral limb buds, expression is heterogeneous, consisting of a broad proximal ring, and a stronger distal expression domain at the terminus of the appendage. Abbreviations as in Fig. 2. All scale bars 100  $\mu\text{m}$ .

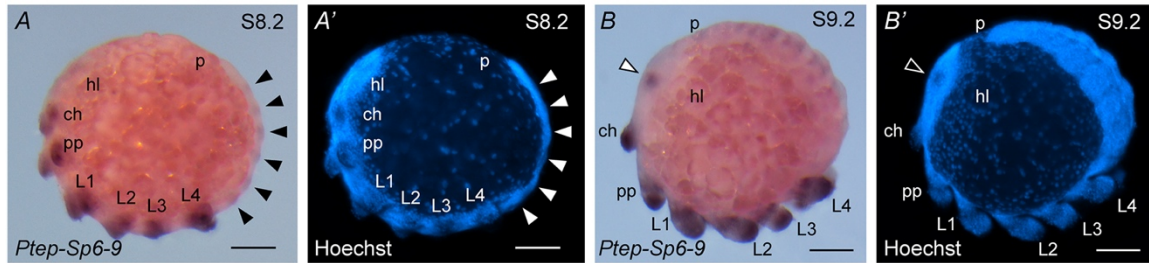

**Fig. S4.** Expression of *Ptep-arr* and sense probe controls. (A) As with insects, *Ptep-arr* is ubiquitously expressed throughout the germband. (B) No staining was observed in the *Ptep-arr* sense control, which was run for the same amount of time as the antisense probes. Similarly, no staining was observed in the *Sp6-9* sense probe controls of the spider (C), the harvestman (D), or the centipede (E); asterisk indicates non-specific staining in the harvestman, resulting from attached remnant of vitelline membrane. All scale bars 100  $\mu$ m.

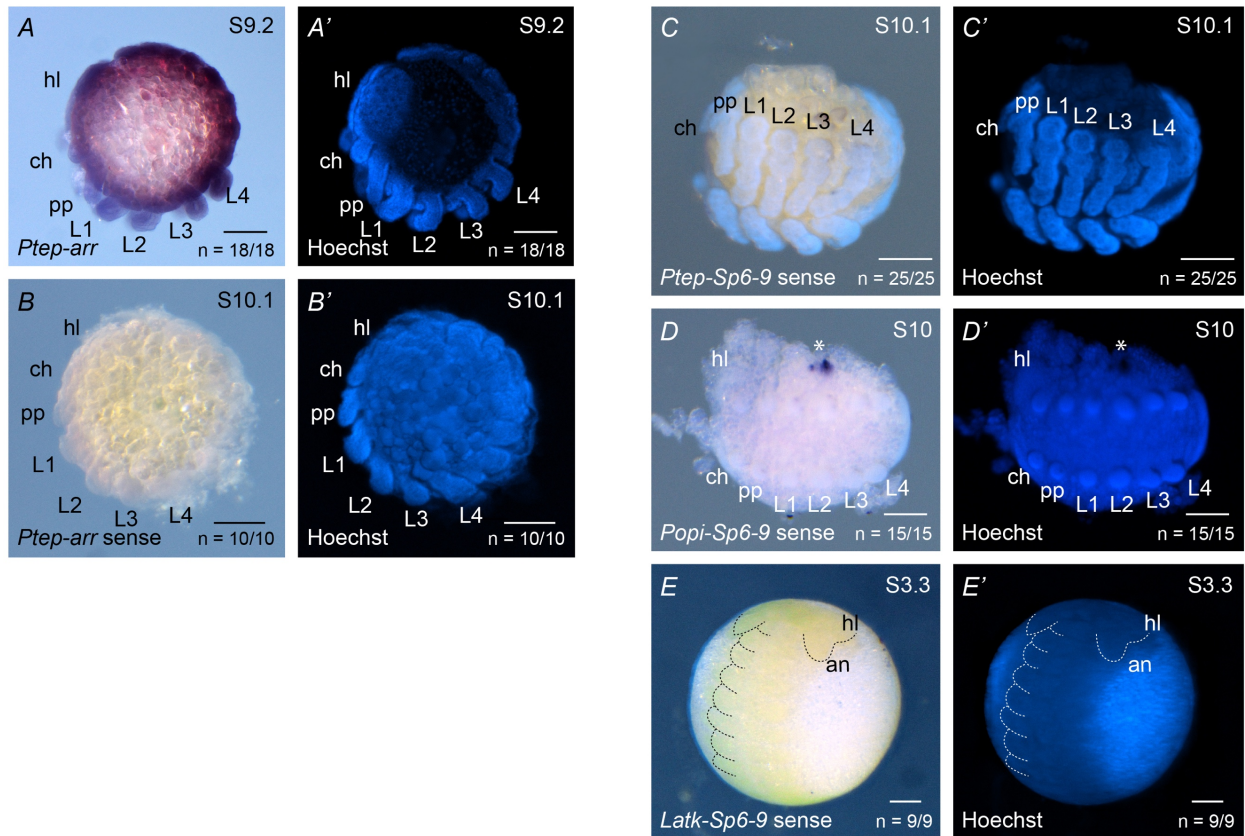

**Fig. S5.** Experimental design of maternal RNAi in the spider and phenotypic distribution. (A) *Ptep-Sp6-9* cDNA transcript indicating relative locations of two non-overlapping fragments targeted for dsRNA synthesis. (B-E) Phenotypic distribution of embryos from second, third, and fourth cocoons. Numbers above bars indicate sample sizes. Parenthetical integers within bars indicate number of adult females surviving injections. Colors correspond to legend at the top right. (B) Negative control females. (C) Females injected with the 5' *Ptep-Sp6-9* dsRNA fragment. (D) Females injected with the 3' *Ptep-Sp6-9* dsRNA fragment. (E) Combined distribution of (C) and (D).

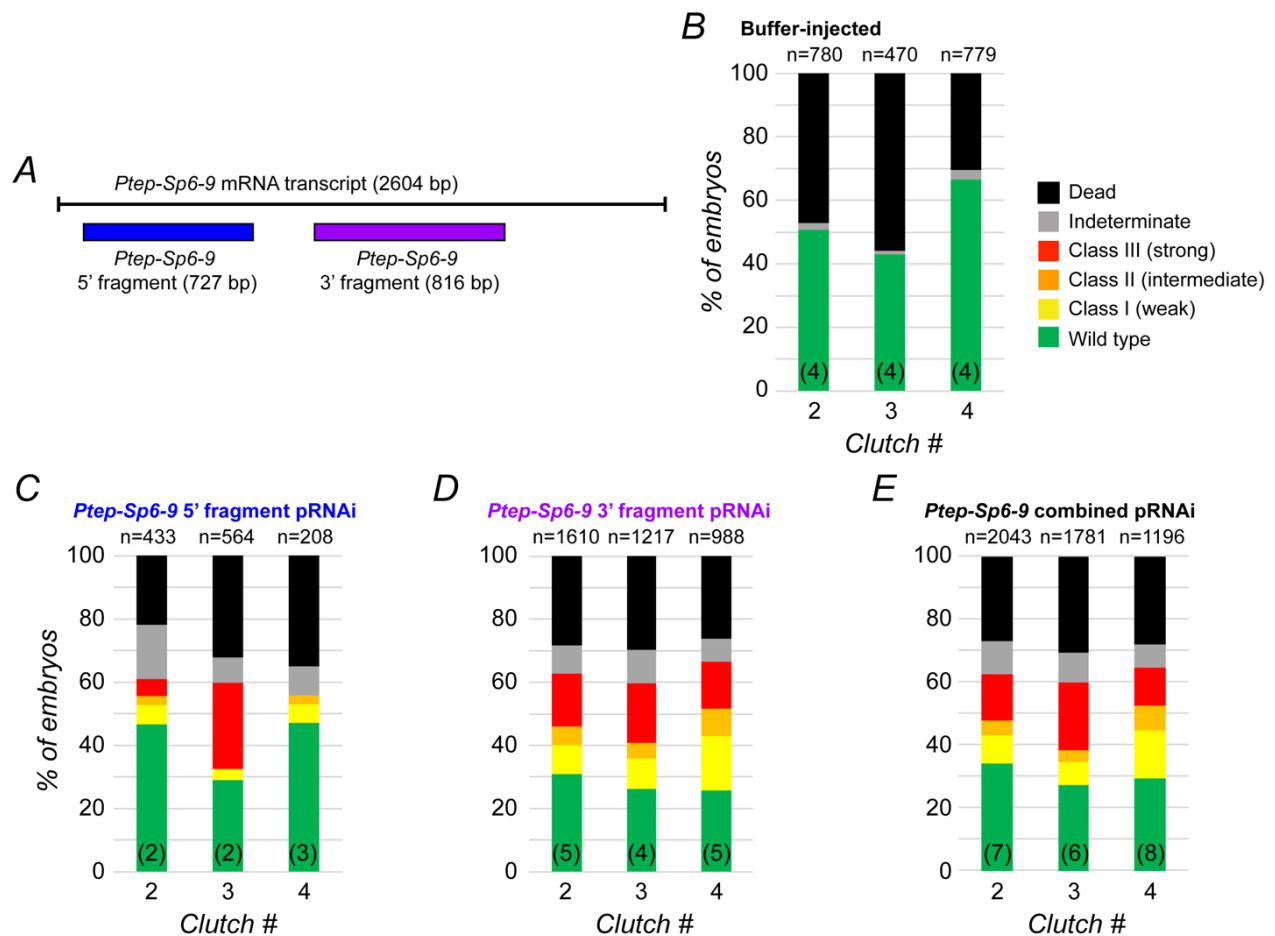

**Fig. S6.** Expression of *Ptep-Sp6-9* is reduced in *Ptep-Sp6-9* RNAi embryos. (A) *Ptep-Sp6-9* expression in a wild type embryo. (B) Reduction of *Ptep-Sp6-9* expression in a *Ptep-Sp6-9* RNAi embryo is correlated with appendage truncation. Abbreviations as in Fig. 2. All scale bars 100  $\mu$ m.

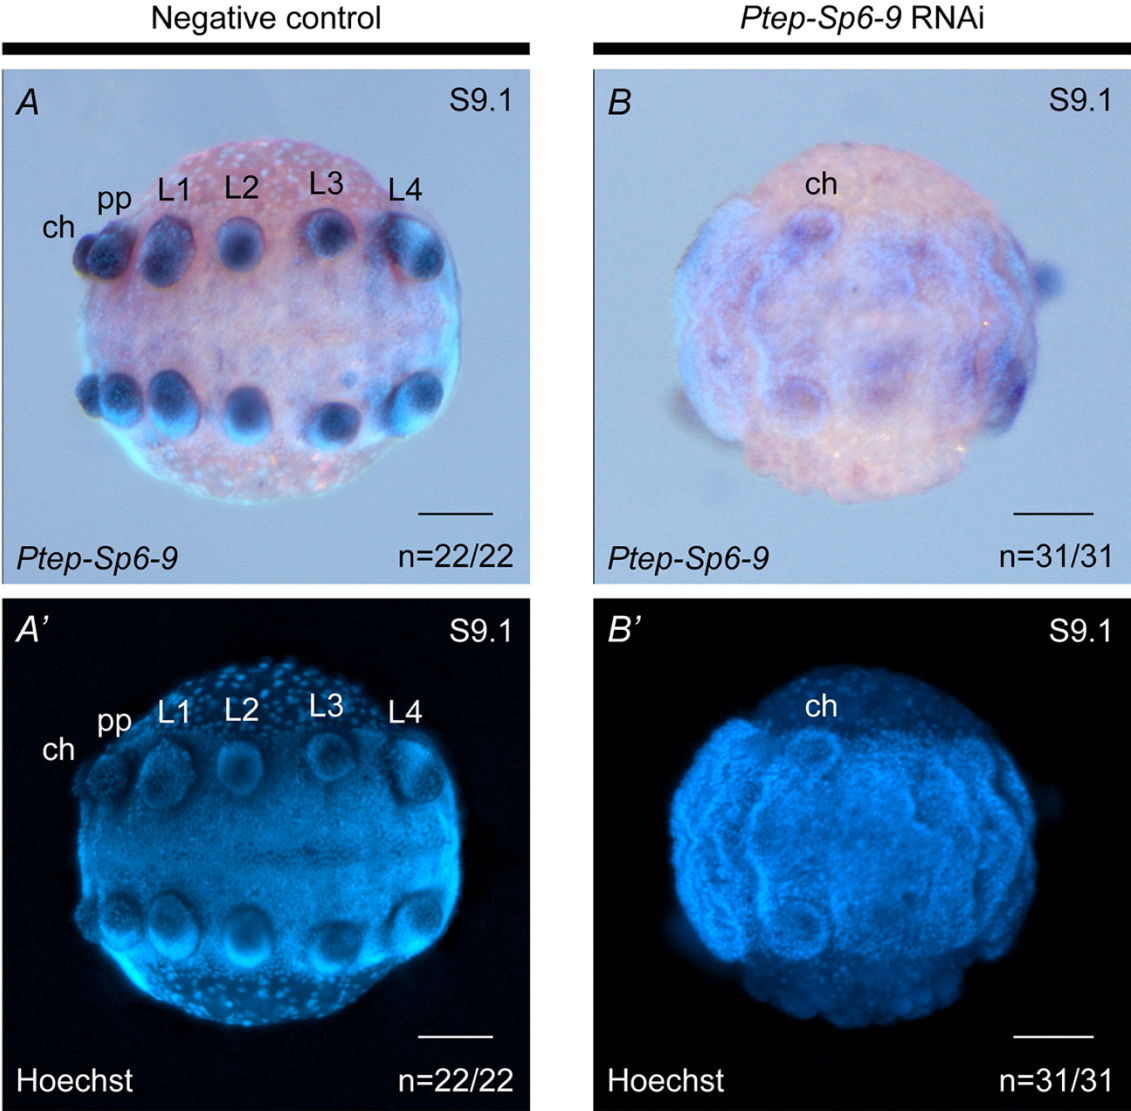

**Fig. S7.** Intermediate phenocopies of *Ptep-Sp6-9* RNAi reveal loss of segmentation gene expression in L1 and L2. (A, B) Expression of the segment polarity gene *Ptep-en-1* in negative control embryos. (C, D) In intermediate *Ptep-Sp6-9*-RNAi phenocopies, loss of *Ptep-en* expression is observed in the L1 and L2 segments (white arrowheads in D). Segments anterior to L1 and posterior to L2 are not affected. Abbreviations as in Fig. 2. All scale bars 100  $\mu$ m.

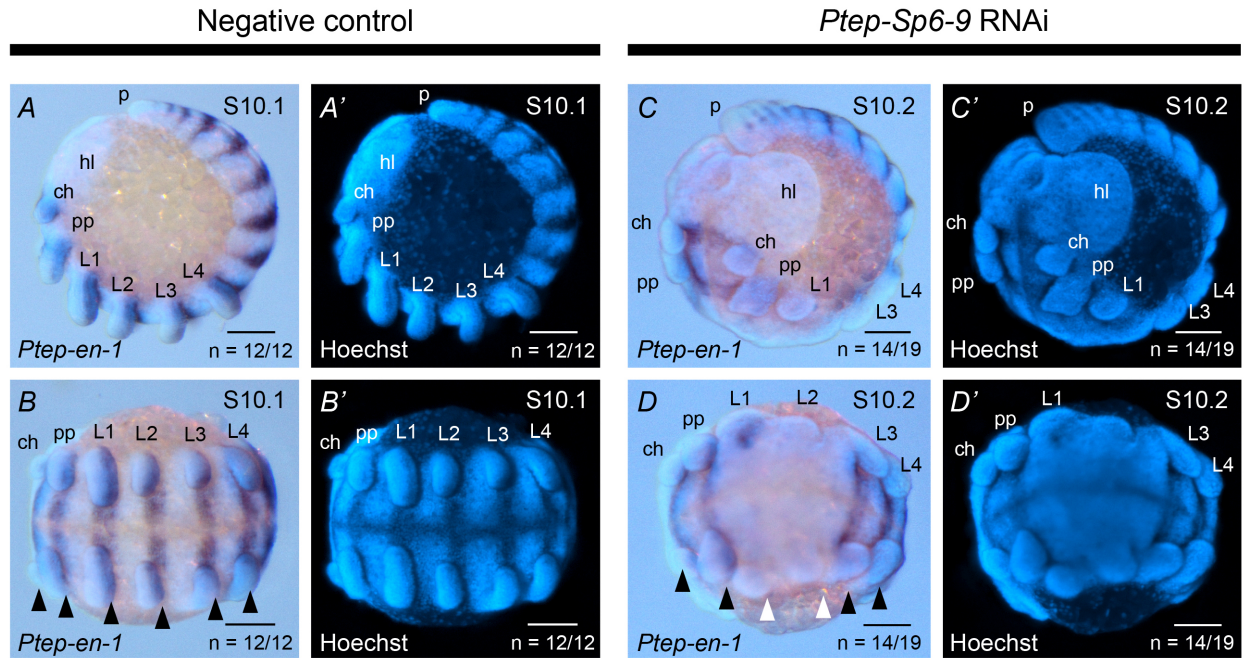

**Fig. S8.** In the weakest subset of *Ptep-Sp6-9* RNAi phenocopies, shortened appendages are observed. (A) In a wild type embryo at stage 14, the walking legs are interlaced, obscuring the ventral surface of the prosoma. (B) A *Ptep-Sp6-9* RNAi embryo showing walking legs of reduced length; the operculum of the prosoma is clearly visible. Note that all four walking legs are present on the animal's right side, indicating no segmentation defect, whereas fusion of adjacent appendages is observed on the left side. Arrowheads indicate the coxapophysis of the pedipalp. All scale bars 100  $\mu$ m.

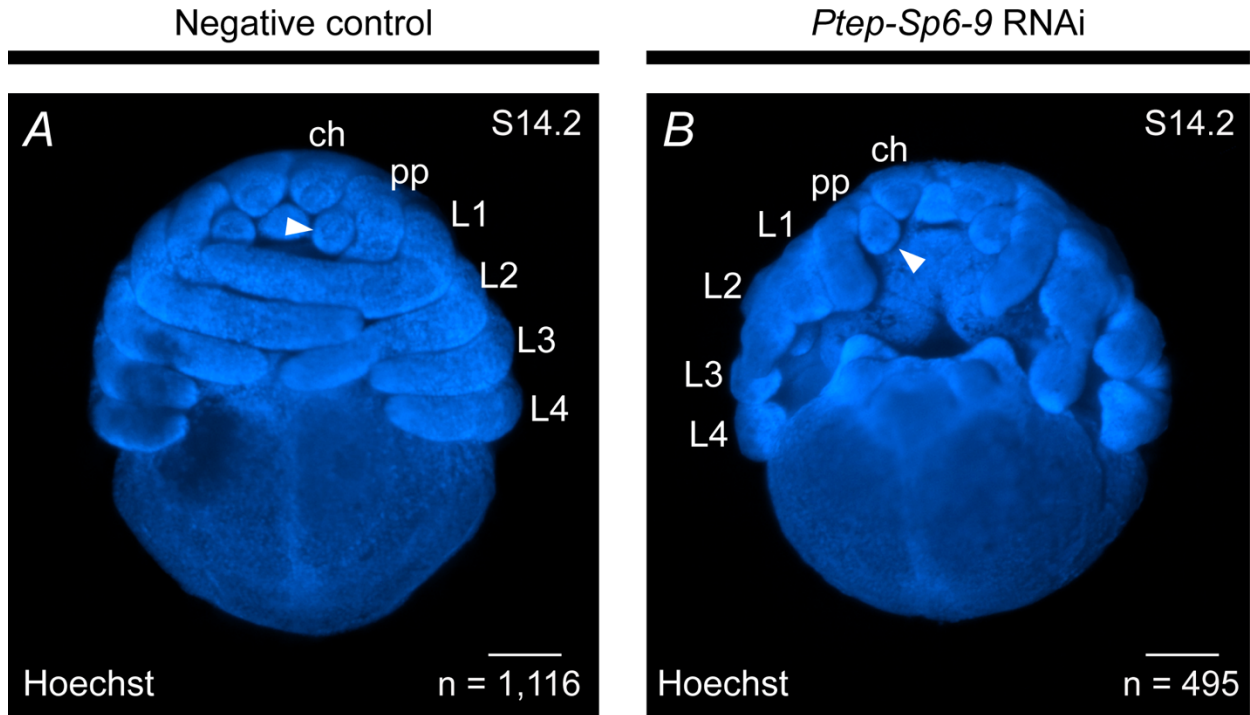



**Fig. S9.** Experimental design of maternal RNAi in the spider and phenotypic distribution. (A) *Ptep-arr* cDNA transcript indicating relative locations of fragment targeted for dsRNA synthesis. (B) Phenotypic distribution of embryos from second through fifth cocoons. Numbers above bars indicate sample sizes. Parenthetical integers within bars indicate number of adult females surviving injections. Colors correspond to legend at the right. For simplicity, all controls are not illustrated (data available in Table S3).

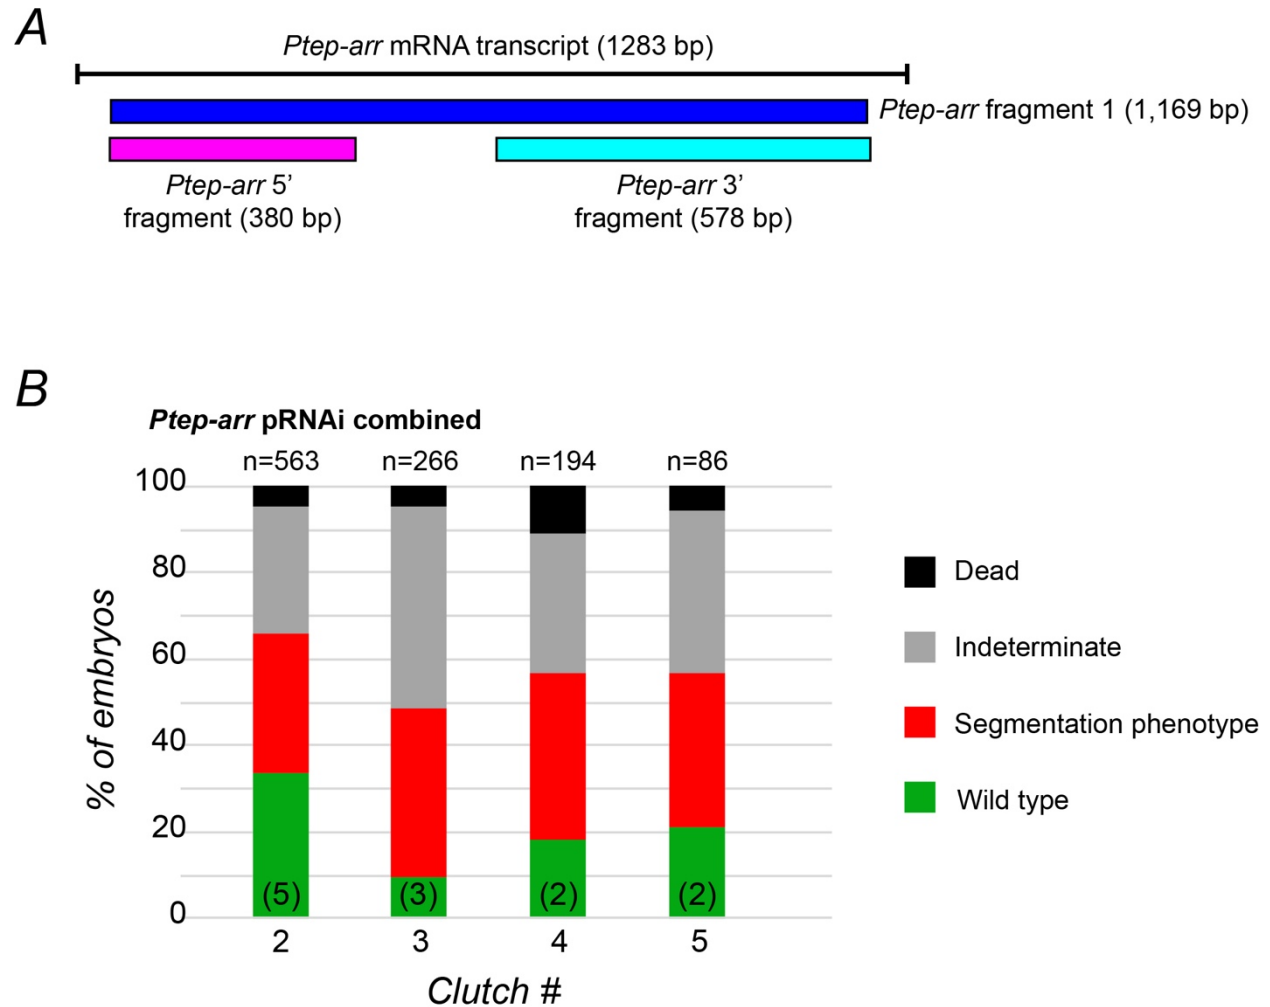

**Table S1.** List of gene-specific primers used for PCR amplification and cloning.

| Locus/primer              | Primer Sequence                        | Length (bp) |
|---------------------------|----------------------------------------|-------------|
| <b><i>Ptep-Sp6-9</i></b>  |                                        |             |
| Ptep_Sp6_9_5'_for         | 5' – TGGATCGTTTGCACGAATAA – 3'         | 727         |
| Ptep_Sp6_9_5'_rev         | 5' – CTCAAGGTCCACTCATCGGT – 3'         |             |
| Ptep_Sp6_9_3'_for         | 5' – ACGCAGCCTTCATTCTCAGT – 3'         | 816         |
| Ptep_Sp6_9_3'_rev         | 5' – CATTGCAGCAAACAAGAGGA – 3'         |             |
| <b><i>Ptep-arr</i></b>    |                                        |             |
| Ptep_arr_for              | 5' – ggccgcggTCCAGCATCTCCCCAACTGA – 3' | 1169        |
| Ptep_arr_rev              | 5' – cccggggcACAGACATGGGGCTAAACCG – 3' |             |
| Ptep_arr_5'_for           | 5' – AATCCAGCATCTCCCCAACT – 3'         | 380         |
| Ptep_arr_5'_rev           | 5' – TTCGTTTATTGGATTGATGGAA – 3'       |             |
| Ptep_arr_3'_for           | 5' – GTGTGGGACAACCACAATGA – 3'         | 578         |
| Ptep_arr_3'_rev           | 5' – ATTGGACAGACATGGGGCTA – 3'         |             |
| <b><i>Ptep-en-1</i></b>   |                                        |             |
| Ptep_en_for               | 5' – CTGCTTGACATTGCCTGAAA – 3'         | 792         |
| Ptep_en_rev               | 5' – GAATCTGCTGGCATTCCATT – 3'         |             |
| <b><i>Ptep-wg</i></b>     |                                        |             |
| Ptep_wg_for               | 5' – TTTCCGAATGCAAACATCAG – 3'         | 925         |
| Ptep_wg_rev               | 5' – ATCATGTGTGGGGTTTCGACT – 3'        |             |
| <b><i>Ptep-DII</i></b>    |                                        |             |
| Ptep_DII_for              | 5' – ATGCCCAGGCTTACCCTATT – 3'         | 819         |
| Ptep_DII_rev              | 5' – TGTCCCATGAGGAGATAGGC – 3'         |             |
| <b><i>Ptep-Antp-1</i></b> |                                        |             |
| Ptep_DII_for              | 5' – CGACAGACTGGA AATACGACCT – 3'      | 694         |
| Ptep_DII_rev              | 5' – GCCTGCTTCCATCTTTGACT – 3'         |             |
| <b><i>Ptep-dac-1</i></b>  |                                        |             |
| Ptep_dac1_for             | 5' – AACCAATCCCAGCATGCTTC – 3'         | 724         |
| Ptep_dac1_rev             | 5' – GTCGTCGTACAGTCAACAC – 3'          |             |
| <b><i>Ptep-otd-1</i></b>  |                                        |             |
| Ptep_otd1_for             | 5' – TACACCCCCAATCCCACTT – 3'          | 782         |
| Ptep_otd1_rev             | 5' – GGCTTGAATCGTCCACTAA – 3'          |             |
| <b><i>Ptep-lab-1</i></b>  |                                        |             |
| Ptep_lab1_for             | 5' – CGATTCATTATAAGAGTGAGAGGC – 3'     | 746         |

|                   |                                         |     |
|-------------------|-----------------------------------------|-----|
| Ptep_lab1_rev     | 5' – GCACTGTCTTAAGCAGTTACATTC – 3'      |     |
| <b>Popi-Sp6-9</b> |                                         |     |
| Popi_Sp6_9_T7_for | 5' – ggccgcggCCCTTCATTCGCAAGTCAAT – 3'  | 775 |
| Popi_Sp6_9_T7_rev | 5' – cccggggcTCCAGGTGGTCCAGGTAATC – 3'  |     |
| <b>Latk-Sp6-9</b> |                                         |     |
| Latk_Sp6_9_for    | 5' – CTTCTTACTCCCGTTCCCGT – 3'          | 708 |
| Latk_Sp6_9_rev    | 5' – ACCGTCAACTCCTTGCCTAA – 3'          |     |
| <b>Cscu-DII</b>   |                                         |     |
| Cscu_DII_for      | 5' – TCCCATTCGGTCGACTTATC – 3'          | 696 |
| Cscu_DII_rev      | 5' – GCAGGATTCATGTCCCAAGA – 3'          |     |
| <b>Cscu-Sp6-9</b> |                                         |     |
| Cscu_Sp6_9_for    | 5' – ggccgcggGCTCTTGCTGGCTAGCTTGT – 3'  | 917 |
| Cscu_Sp6_9_rev    | 5' – cccggggcGATGGCATAACGGGAGAAAGA – 3' |     |

**Table S2.** Tabulation of raw phenotypic distribution data in *Ptep-Sp6-9-RNAi* experiments.

| <b>5' <i>Ptep-Sp6-9</i> RNAi</b> | <b>N</b> | <b>Wild type</b> | <b>Class I</b> | <b>Class II</b> | <b>Class III</b> | <b>Indeterminate</b> | <b>Dead</b> |
|----------------------------------|----------|------------------|----------------|-----------------|------------------|----------------------|-------------|
| <i>cocoon 2</i>                  | 433      | 202              | 26             | 13              | 23               | 74                   | 95          |
| <i>cocoon 3</i>                  | 564      | 164              | 19             | 0               | 154              | 45                   | 182         |
| <i>cocoon 4</i>                  | 208      | 98               | 12             | 6               | 0                | 19                   | 73          |
| <i>Total</i>                     | 1205     | 464              | 57             | 19              | 177              | 138                  | 350         |
| <b>3' <i>Ptep-Sp6-9</i> RNAi</b> |          |                  |                |                 |                  |                      |             |
| <b>3' <i>Ptep-Sp6-9</i> RNAi</b> | <b>N</b> | <b>Wild type</b> | <b>Class I</b> | <b>Class II</b> | <b>Class III</b> | <b>Indeterminate</b> | <b>Dead</b> |
| <i>cocoon 2</i>                  | 1610     | 496              | 151            | 92              | 271              | 144                  | 456         |
| <i>cocoon 3</i>                  | 1217     | 320              | 118            | 58              | 230              | 131                  | 360         |
| <i>cocoon 4</i>                  | 988      | 255              | 169            | 86              | 148              | 71                   | 259         |
| <i>Total</i>                     | 3815     | 1071             | 438            | 236             | 649              | 346                  | 1075        |
| <b>Negative control</b>          |          |                  |                |                 |                  |                      |             |
| <b>Negative control</b>          | <b>N</b> | <b>Wild type</b> | <b>Class I</b> | <b>Class II</b> | <b>Class III</b> | <b>Indeterminate</b> | <b>Dead</b> |
| <i>cocoon 2</i>                  | 780      | 396              | 0              | 0               | 0                | 17                   | 367         |
| <i>cocoon 3</i>                  | 470      | 202              | 0              | 0               | 0                | 5                    | 263         |
| <i>cocoon 4</i>                  | 779      | 518              | 0              | 0               | 0                | 25                   | 236         |
| <i>Total</i>                     | 2029     | 1116             | 0              | 0               | 0                | 47                   | 866         |

**Table S3.** Tabulation of raw phenotypic distribution data in *Ptep-arr-RNAi* experiments.

| <b><i>Ptep-arr</i> RNAi</b> | <b>N</b> | <b>Wild type</b> | <b>Segmentation phenotype</b> | <b>Indeterminate</b> | <b>Dead</b> |
|-----------------------------|----------|------------------|-------------------------------|----------------------|-------------|
| <i>cocoon 2</i>             | 563      | 190              | 181                           | 166                  | 26          |
| <i>cocoon 3</i>             | 266      | 26               | 103                           | 125                  | 12          |
| <i>cocoon 4</i>             | 194      | 35               | 75                            | 63                   | 21          |
| <i>cocoon 5</i>             | 86       | 18               | 31                            | 32                   | 5           |
| <i>Total</i>                | 1109     | 269              | 390                           | 386                  | 64          |
| <b>Negative control</b>     |          |                  |                               |                      |             |
| <b>Negative control</b>     | <b>N</b> | <b>Wild type</b> | <b>Segmentation phenotype</b> | <b>Indeterminate</b> | <b>Dead</b> |
| <i>cocoon 2</i>             | 303      | 215              | 0                             | 73                   | 15          |
| <i>cocoon 3</i>             | 448      | 356              | 0                             | 71                   | 21          |
| <i>cocoon 4</i>             | 297      | 227              | 0                             | 55                   | 15          |
| <i>cocoon 5</i>             | 497      | 409              | 0                             | 49                   | 39          |
| <i>Total</i>                | 1545     | 1207             | 0                             | 248                  | 90          |
